# Supplementary material for: Formamide-soluble solid-state ZnO as Zn source for synthesizing FeCo–NC with ultrahigh oxygen reduction reaction activity
Source: Royal Society of Chemistry journal article supplement (doi:10.1039/d1qm01256h), 2021-11-11
Supplement: d1qm01256h1.pdf [file d1qm01256h1.pdf]

Supporting Information for

# **Formamide-soluble solid-state ZnO as Zn source for synthesizing FeCo-NC with ultrahigh oxygen reduction reaction activity**

*Yanhui Sun<sup>a,b</sup>, Zongge Li<sup>b</sup>, Yinglong Wu<sup>a</sup>, Jinrui Tian<sup>a</sup>, Yaqun Wang<sup>b</sup>, Miaosen Yang<sup>a,\*</sup>,  
and Guoxin Zhang<sup>b,\*</sup>*

*a. School of Chemical Engineering, Northeast Electric Power University, Jilin, Jilin 132012, China. E-mail: [msyang@neepu.edu.cn](mailto:msyang@neepu.edu.cn)*

*b. Al-ion Battery Research Center, Department of Electrical Engineering and Automation, Shandong University of Science and Technology, Qingdao, Shandong 266590, China. E-mail: [zhanggx@sdust.edu.cn](mailto:zhanggx@sdust.edu.cn)*

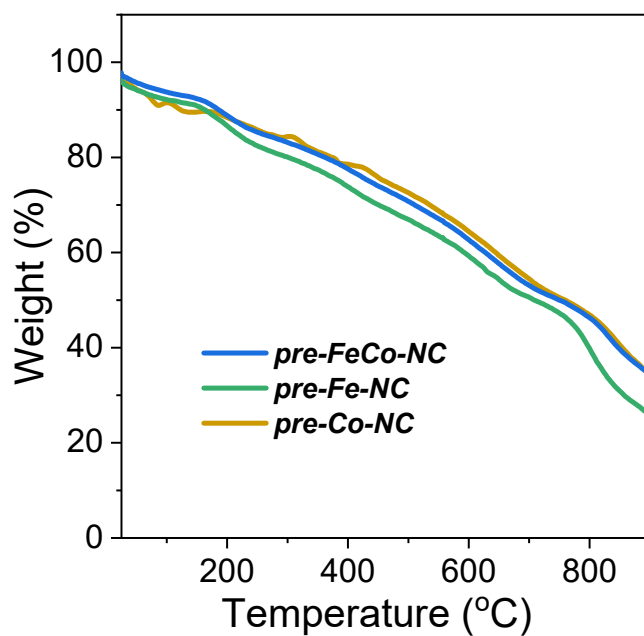

**Figure S1.** TGA of pre-FeCo-NC with comparison to pre-Fe-NC and pre-Co-NC, performed in N<sub>2</sub> protection.

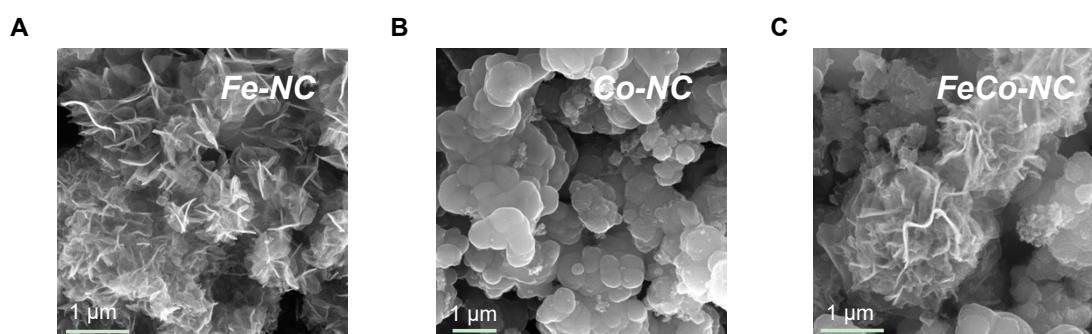

**Figure S2.** SEM images of (A) Fe-NC, (B) Co-NC, and (C) FeCo-NC.

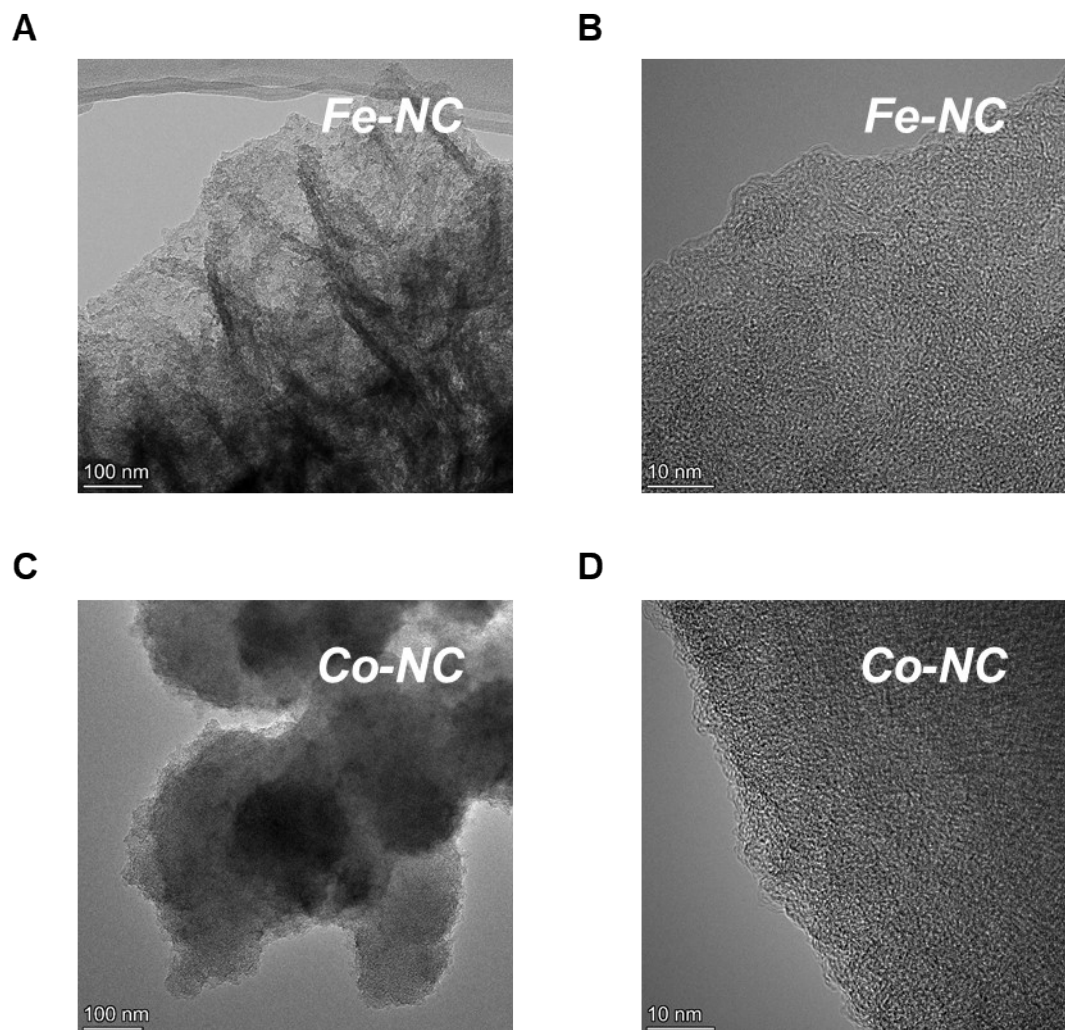

**Figure S3.** (A) TEM image and (B) HRTEM image of Fe-NC. (C) TEM image and (D) HRTEM image of Co-NC.

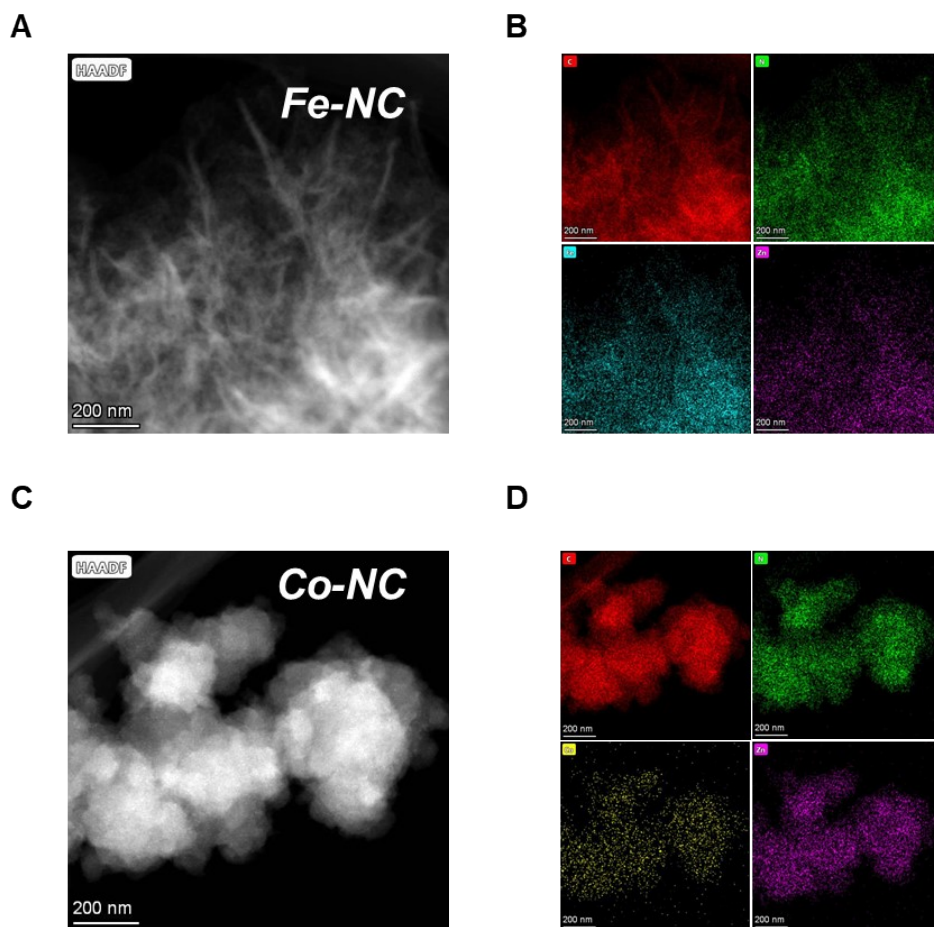

**Figure S4.** (A) HRTEM-HAADF image and (B) EDS mapping images of Fe-NC. (C) HRTEM-HAADF image and (D) EDS mapping images of Co-NC.

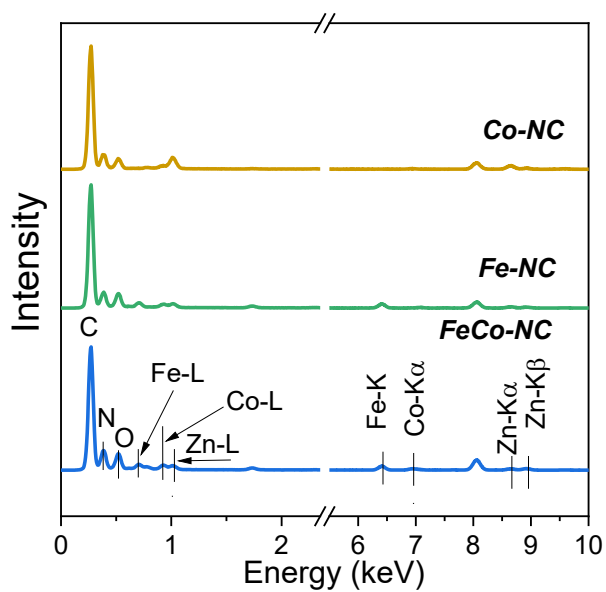

**Figure S5.** EDS spectra of Fe-NC, Co-NC, and FeCo-NC.

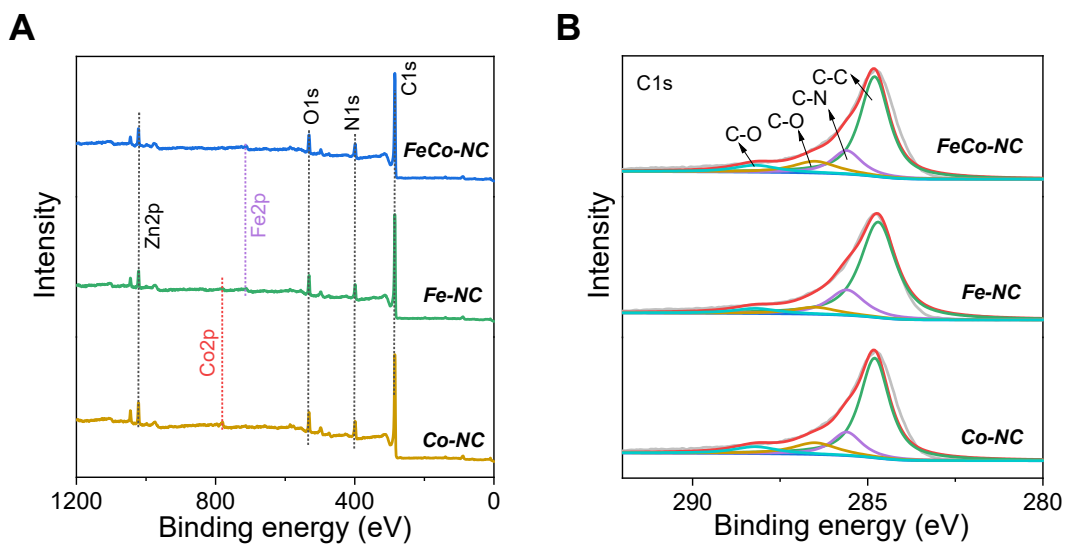

**Figure S6.** (A) XPS survey spectra and (B) C1s spectra of FeCo-NC with comparison to Fe-NC, Co-NC.

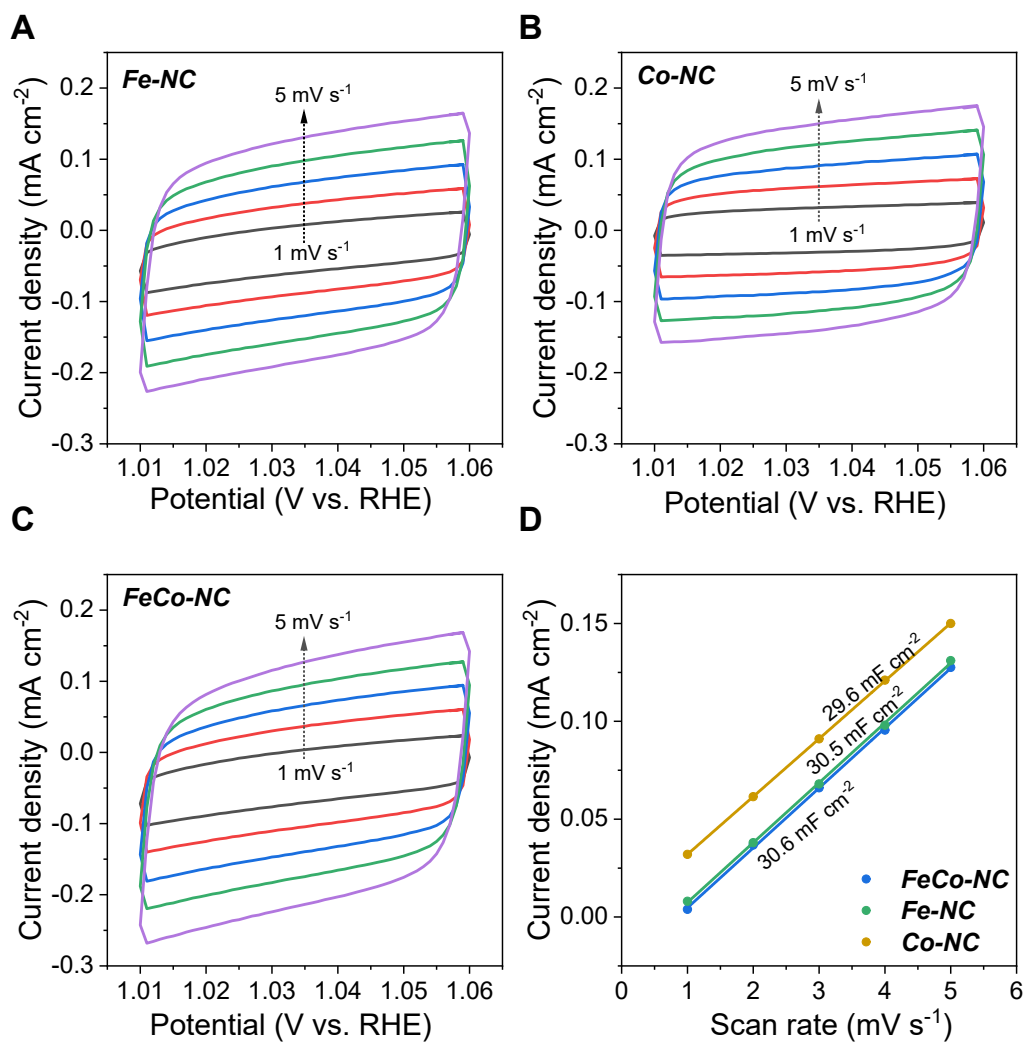

**Figure S7.** Cyclic voltammograms of (A) Fe-NC, (B) Co-NC, and (C) FeCo-NC at different rates ranging from 1–5 mV s<sup>-1</sup> in the potential region from 1.01 to 1.06 V vs. RHE. (D) Plots of capacitive current density at 1.035 V versus scan rate, corresponding slope can be used for determining the electrochemically accessible surface area.

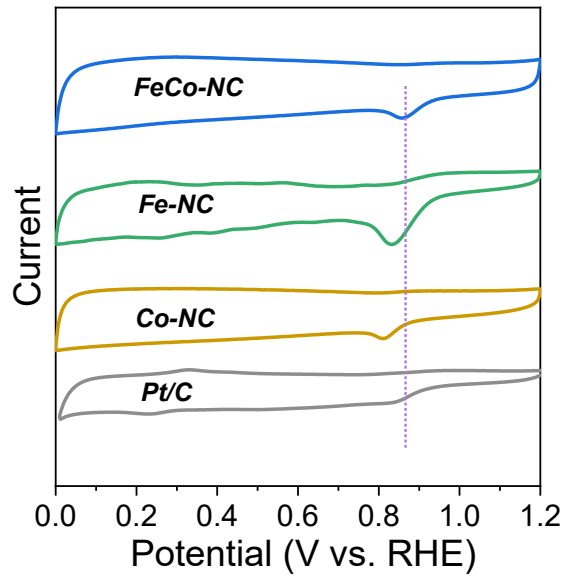

**Figure S8.** CV profiles of FeCo-NC with comparison to Fe-NC, Co-NC, and Pt/C, scan rate = 20 mV s<sup>-1</sup>.

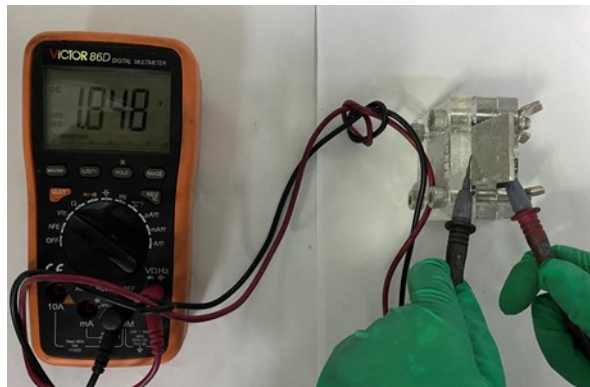

**Figure S9.** Picture of open-circuit voltage measurement of FeCo-NC-assembled Al-air battery.

**Table S1.** XPS element contents of FeCo-NC with comparison to Fe-NC and Co-NC

| Sample  | C (at.%) | N (at.%) | O (at.%) | Fe (at.%) | Co (at.%) | Zn (at.%) |
|---------|----------|----------|----------|-----------|-----------|-----------|
| FeCo-NC | 80.75    | 9.54     | 7.26     | 0.75      | 0.47      | 1.23      |
| Fe-NC   | 81.64    | 8.99     | 7.16     | 0.98      | -         | 1.22      |
| Co-NC   | 79.76    | 10.59    | 7.23     | -         | 0.83      | 1.59      |

**Table S2.** ICP elemental contents of Fe-NC, Co-NC, and FeCo-NC.

| Sample  | Fe (wt.%) | Co (wt.%) |
|---------|-----------|-----------|
| Fe-NC   | 5.06      | -         |
| Co-NC   | -         | 1.82      |
| FeCo-NC | 3.12      | 1.05      |
